# Supplementary material for: Decreased GLUT2 and glucose uptake contribute to insulin secretion defects in MODY3/HNF1A hiPSC-derived mutant β cells
Source: PubMed Central journal article supplement (PMC8149827; doi:10.1038/s41467-021-22843-4), 2021-05-25
Supplement: 41467_2021_22843_MOESM1_ESM.pdf [file 41467_2021_22843_MOESM1_ESM.pdf]

## SUPPLEMENTARY INFORMATION

**Supplementary Table 1. Key Resources.**

| REAGENT or RESOURCE                                  | SOURCE                               | IDENTIFIER                  |
|------------------------------------------------------|--------------------------------------|-----------------------------|
| <b>Antibodies</b>                                    |                                      |                             |
| Goat anti-OCT4                                       | Santa Cruz                           | sc-8628 RRID:AB_653551      |
| Rabbit anti-SOX2                                     | Abcam                                | ab97959 RRID:AB_2341193     |
| Goat anti-NANOG                                      | R&D Systems                          | AF1997 RRID:AB_355097       |
| Mouse anti-SSEA4                                     | STEMCELL Technologies                | 60062AD RRID:AB_2721031     |
| Mouse anti-TRA-1-60                                  | STEMCELL Technologies                | 60064AD RRID:AB_2686905     |
| Mouse anti-ACTB ( $\beta$ -actin)                    | Cell Signaling Technology            | 3700S RRID:AB_2242334       |
| Rat anti-C-peptide                                   | Developmental Studies Hybridoma Bank | GN-ID4 RRID:AB_2255626      |
| Mouse anti-GATA4                                     | Thermo Fisher Scientific             | MA5-15532 RRID:AB_10989032  |
| Rabbit anti-GLUT2                                    | Abcam                                | ab95256 RRID:AB_10859605    |
| Rabbit anti-GLUT2                                    | Santa Cruz                           | sc-9117 RRID:AB_641068      |
| Rabbit anti-HNF1A                                    | Abcam                                | ab96777 RRID:AB_10679303    |
| Goat anti-HNF1A                                      | Santa Cruz                           | sc-6547 RRID:AB_648295      |
| Goat anti-HNF1A                                      | Santa Cruz                           | sc-6548 RRID:AB_648293      |
| Rabbit anti-HNF1A                                    | Abcam                                | ab204306                    |
| Guinea pig anti-INS                                  | Abcam                                | ab7842 RRID:AB_306130       |
| Goat anti-NKX6.1                                     | LifeSpan BioSciences                 | LS-C124275 RRID:AB_10805839 |
| Guinea pig anti-PDX1                                 | Abcam                                | ab47308 RRID:AB_777178      |
| Goat anti-PDX1                                       | R&D Systems                          | AF2419 RRID:AB_355257       |
| <b>Chemicals, Peptides, and Recombinant Proteins</b> |                                      |                             |
| Dulbecco's High Glucose Modified Eagles Medium       | HyClone™                             | #SH30022FS                  |
| DMEM medium with no glucose                          | Gibco™                               | 11966025                    |
| DMEM/F12 with GlutaMAX supplement, Pyruvate          | Invitrogen                           | 10565042                    |
| GE Healthcare Fetal Bovine Serum                     | HyClone™                             | 11521851                    |
| KnockOut Serum Replacement (KOSR)                    | Invitrogen                           | 10828028                    |
| BSA                                                  | Sigma-Aldrich                        | A9418                       |

| <b>REAGENT or RESOURCE</b>       | <b>SOURCE</b>            | <b>IDENTIFIER</b> |
|----------------------------------|--------------------------|-------------------|
| GlutaMAX™ Supplement             | Gibco™                   | 11574466          |
| Non-essential amino acids (NEAA) | Invitrogen               | 11140050          |
| Beta-mercaptoethanol (1000X)     | Gibco™                   | 21985023          |
| Trypsin-EDTA 0.25%               | Gibco™                   | 25300054          |
| ReLeSR™                          | STEMCELL Technologies    | 05873             |
| TrypLE™ Express Enzyme           | ThermoFisher             | 12605010          |
| Fibronectin                      | Sigma-Aldrich            | F0895             |
| Fisetin                          | MERCK                    | F4043             |
| ECM                              | Sigma-Aldrich            | E1270             |
| D-Glucose                        | Sigma-Aldrich            | G8769             |
| Gelatin                          | MERCK                    | ES-006-B          |
| Glibenclamide                    | Sigma-Aldrich            | G0639             |
| Ionomycin calcium salt           | Sigma-Aldrich            | I0634             |
| L-Ascorbic acid (vitamin C)      | Sigma-Aldrich            | A92902            |
| Penicilin/Streptomycin           | Gibco™                   | 15140122          |
| Potassium Chloride               | Merck                    | 7447-40-7         |
| Y-27632                          | STEMCELL Technologies    | 72302             |
| FGF2                             | MACS                     | 130-093-840       |
| Activin A                        | R&D Systems              | 338-AC-50         |
| CHIR-99021                       | Tocris                   | 4423              |
| BMP4                             | STEMCELL Technologies    | 02524             |
| SB431542                         | Abcam                    | AB120163          |
| FGF7                             | MACS                     | 130-097-178       |
| SANT-1                           | Santa Cruz               | sc-203253         |
| LDN193189                        | Sigma                    | SML0559-5MG       |
| RA                               | Sigma                    | D2650-10          |
| LY294002                         | LC Labs                  | L-7962            |
| LDN                              | Stemgent                 | 04-0019           |
| ITS-X                            | Thermo Fisher Scientific | 51500-056         |
| PDBu                             | Tocris                   | 4153              |
| T3                               | Millipore                | 642511            |

| REAGENT or RESOURCE                           | SOURCE                             | IDENTIFIER                                                         |
|-----------------------------------------------|------------------------------------|--------------------------------------------------------------------|
| ALK5 inhibitor II                             | Enzo Life Sciences                 | ALX-270-445                                                        |
| Heparin                                       | Sigma-Aldrich                      | H3149                                                              |
| Transferrin                                   | Sigma-Aldrich                      | T8158-100MG                                                        |
| Sodium selenite                               | Sigma-Aldrich                      | 214485-100G                                                        |
| hBTC                                          | Cell Signaling Technologies        | 5235SF                                                             |
| XXI                                           | Millipore                          | 565790                                                             |
| <b>Commercial Assays</b>                      |                                    |                                                                    |
| Nucleospin® RNA kit                           | Macherey-Nagels                    | 740955.250                                                         |
| iTaq™ Universal SYBR® Green Supermix          | Bio-Rad Laboratories               | 1725125                                                            |
| High-Capacity cDNA Reverse Transcription Kit  | Applied Biosystems                 | 4368814                                                            |
| Glucose Uptake Colorimetric Assay Kit         | Sigma-Aldrich                      | MAK083                                                             |
| ADP/ATP Bioluminescence Assay Kit (ApoSENSOR) | Biovision Incorporated             | K255                                                               |
| Mercodia Insulin ELISA                        | Mercodia Immunoassays and Services | 10-1113-01                                                         |
| C-peptide ELISA                               | Mercodia                           | 10-1136-01                                                         |
| Dual Luciferase Assay System                  | Promega                            | E1980                                                              |
| <b>Deposited Data</b>                         |                                    |                                                                    |
| RNA-sequencing                                | This paper                         | GSE140208                                                          |
| ChIP-sequencing                               | This paper                         | GSE139832                                                          |
| <b>Experimental Models: Cell Lines</b>        |                                    |                                                                    |
| H9 hESC line                                  | WiCell Research Institute          | NIHhESC-10-0062 RRID:CVCL_9773                                     |
| AD-293 line                                   | Agilent                            | 240085 RRID:CVCL_KA63                                              |
| EndoC-βH1 line                                | Univercell Biosolutions            | EndoC-βH1 RRID:CVCL_L909                                           |
| Fibroblast (to generate iAGb)                 | Coriell Institute                  | AG16102 RRID:CVCL_2G48                                             |
| CF-1 MEF                                      | Gibco                              | A34181 RRID:CVCL_5251                                              |
| <b>Experimental Models: Organisms/Strains</b> |                                    |                                                                    |
| NOD-SCID mice                                 | Taconic Biosciences                | NOD/MrkBomTac- <i>Prkdc</i> <sup>scid</sup><br>RRID:IMSR_TAC:nodsc |
| <b>Software and Algorithms</b>                |                                    |                                                                    |

| <b>REAGENT or RESOURCE</b>                 | <b>SOURCE</b>  | <b>IDENTIFIER</b>                                                                                                                   |
|--------------------------------------------|----------------|-------------------------------------------------------------------------------------------------------------------------------------|
| PRISM v8 graphing and statistical software | GraphPad       | <a href="http://www.graphpad.com/scientific-software/prism/">http://www.graphpad.com/scientific-software/prism/</a> RRID:SCR_002798 |
| FlowJo 7.0 software                        | BD Biosciences | <a href="https://www.flowjo.com/solutions/flowjo/">https://www.flowjo.com/solutions/flowjo/</a> RRID:SCR_008520                     |

**Supplementary Table 2. Quantitative real-time PCR primers used in this study.**

| <b>Gene</b>   | <b>Accession Number</b> | <b>Forward Primer (5' to 3')</b> | <b>Reverse Primer (5' to 3')</b> |
|---------------|-------------------------|----------------------------------|----------------------------------|
| <i>ABHD15</i> | NM_198147               | GCTGTTCGCGGTGAGCGAAG             | GGCATACCTGCTGAGGGCGAT            |
| <i>ACTB</i>   | NM_001101               | TTGCCGATCCGCCGCCCGTC             | CCCATGCCACCATCACGCCCTG           |
| <i>ANKS4B</i> | NM_145865               | TGGCCAAGTTCTGGTGAGCAGG           | GGGTCCCCTCCTCTACTGCAGATT         |
| <i>FGFR4</i>  | NM_002011               | GGAGCGCTCGGGCTGTCTG              | TGCCTTCCTGGCTCCTCCTCA            |
| <i>GLIS3</i>  | NM_001042413            | CGGACGCATCTGGACACCAAAC           | GGGACTGCACGGTGAGGCAA             |
| <i>GLUT1</i>  | NM_006516               | AGCAGCAAGAAGCTGACGGGTCGCC        | AGCGTGGTGAGCGTGGTGGGC            |
| <i>GLUT2</i>  | NM_000340               | TTGGTGGGTGGCTTGGGGAC             | ACCAGGCCTGAAATTAGCCCACA          |
| <i>GLUT3</i>  | NM_006931               | GCTAAGCAGATCCTCCAGCGGT           | ATTAACCACACCCGCGCCGA             |
| <i>GPR39</i>  | NM_001508               | GCAGACCATCATCTTCCTGAGGCT         | GTCGTGCTTGGGTTTGGCCG             |
| <i>HNF1A</i>  | NM_001306179            | CTTCTGCAGGAGGACCCGTGGCGT         | GGCGGCCCGCTTCTGCGTCT             |
| <i>HNF4A</i>  | NM_178849               | GGACGACCAGGTGGCCCTGCTCAGA        | GCTCCGGGCAGTGCCGAGGGA            |
| <i>INS</i>    | NM_000207               | CCTGCAGGTGGGGCAGGTGGAGC          | CGGGTGTGGGGCTGCCTGCG             |
| <i>LAMA1</i>  | NM_005559               | ACAGCGCAAACCCAGAGAACGCCA         | CCAGGTCGAGGGGCATTGGCAGC          |
| <i>NRARP</i>  | NM_001004354            | TGGGTGGAGTTTGTGCGCCT             | CACCATCAGGCTGGGCGGTA             |
| <i>PAK4</i>   | NM_005884               | AGTTAGGCCGCGAGCGACTG             | GTGCGGCCTGGTCTGATGCT             |
| <i>PDGFA</i>  | NM_002607               | CGGGCCGCGCTCCCTAAG               | CGGCTTCCTCGGCCAGAACA             |
| <i>TM4SF4</i> | NM_004617               | CGATTTGCGATGTTACCTCCACG          | GAGGCTCTCGGCACTTGTTCCA           |
| <i>TSPAN8</i> | NM_004616               | AGTCGCTGCATGCTTCTGTTGTTTT        | CCCCTGTGGCGCTCAAAGC              |
| <i>UGT2B4</i> | NM_021139               | TGCCAAACCCCTACCGAAGGAAA          | TGTGGGATCTTGCAAGGGCT             |

Figure S1: Low et al.,

a

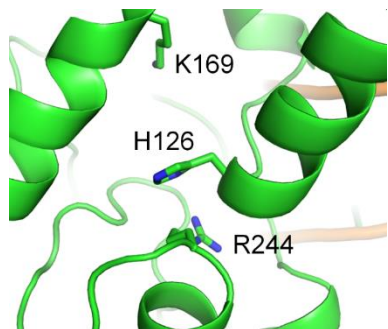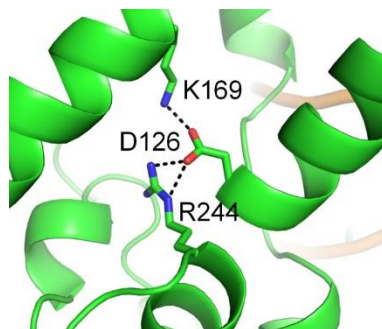

**Supplementary Figure 1. Interactions of residue 126 in HNF1A–DNA complex.** Crystal structure of WT HNF1A–DNA complex (PDB 1IC8) (Chi et al., 2002). Final trajectory structure obtained from accelerated molecular dynamics (aMD) simulation of mutant HNF1A H126D–DNA complex.

Figure S2: Low et al.,

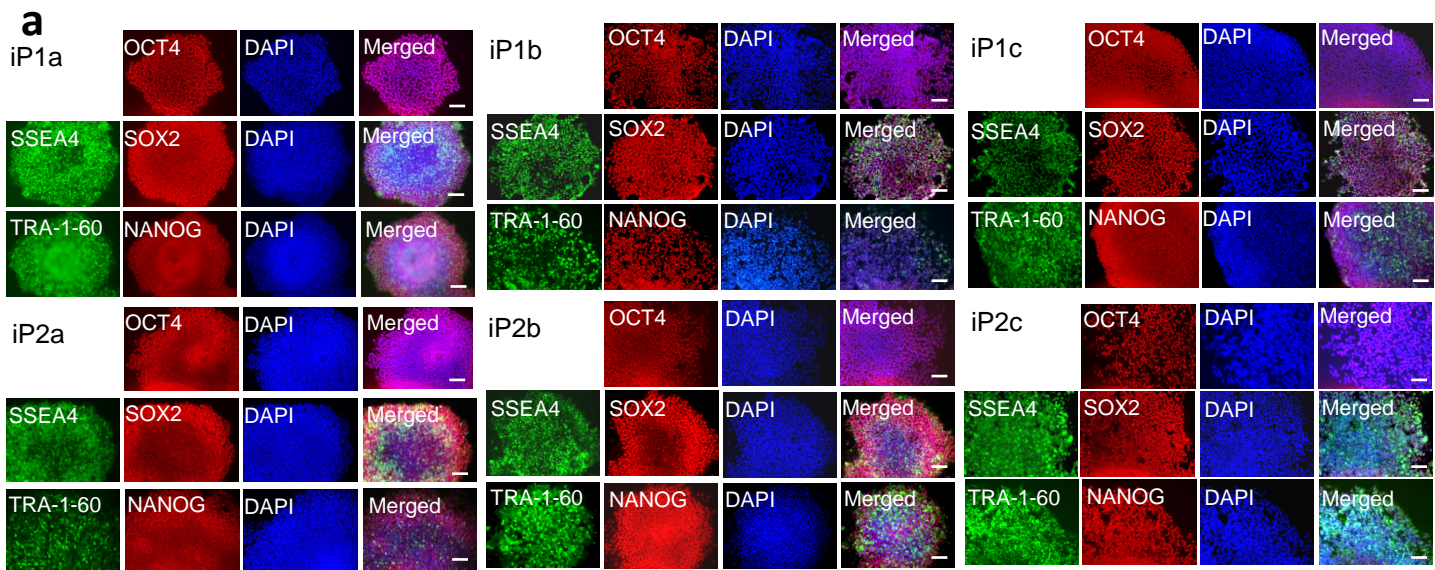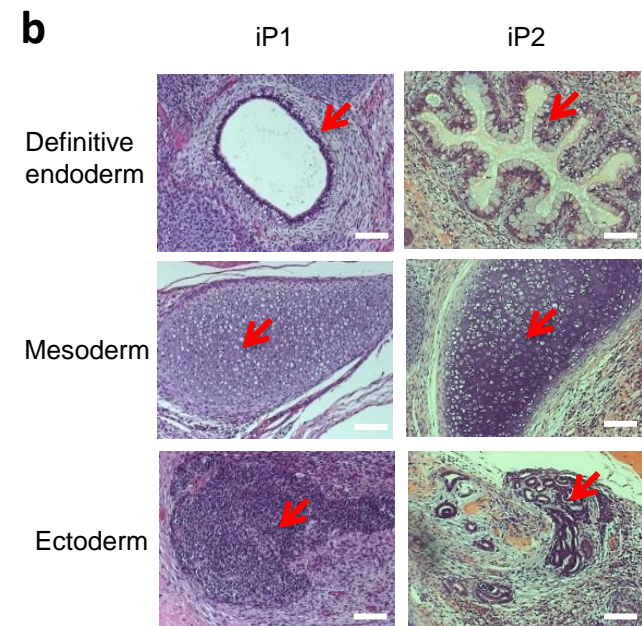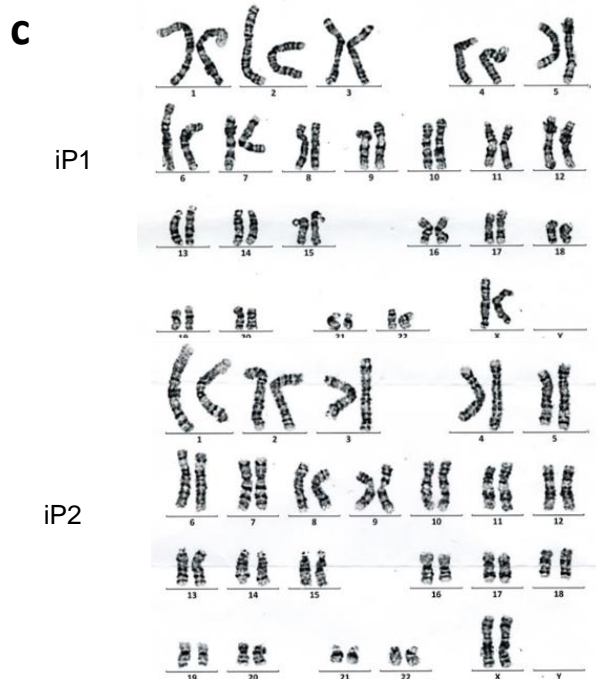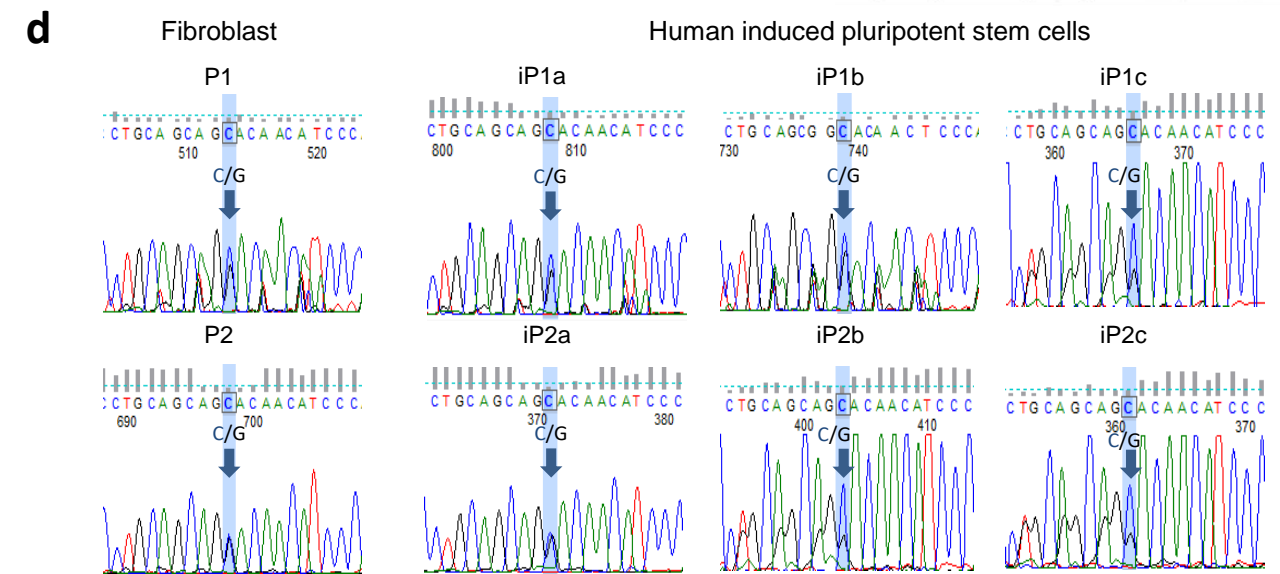



## Supplementary Figure 2. Characterization of MODY3-hiPSCs.

(a) Immunohistochemistry stain for pluripotency markers OCT4 (red), SOX2 (red), SSEA4 (green), NANOG (red) and TRA-1-60 (green) and nuclear stain using DAPI (blue). n = 3 independent experiments. (scale bar:100µM). (b) Hematoxylin and eosin (H&E) stain of teratoma tissue section formed by patient-derived hiPSCs. Presence of three germ layers (indicated by red arrows): definitive endoderm, mesoderm, ectoderm. n = 1 independent experiment. (scale bar: 100 µm). (c) Karyotyping analysis confirmed normal karyotype of hiPSCs derived from P1 and P2. (d) Cycle sequencing confirmed the presence of heterozygous *HNF1A*<sup>+/H126D</sup> mutation (highlighted) in patient-derived hiPSCs. Cytosine in blue, thymine in red, guanine in black, adenine in green. hiPSCs: human induced pluripotent stem cells. iP1a-c: hiPSC lines generated from P1, iP2a-c: hiPSC lines generated from P2. P1: patient 1, P2: patient 2.

# Figure S3: Low et al.,

**a**

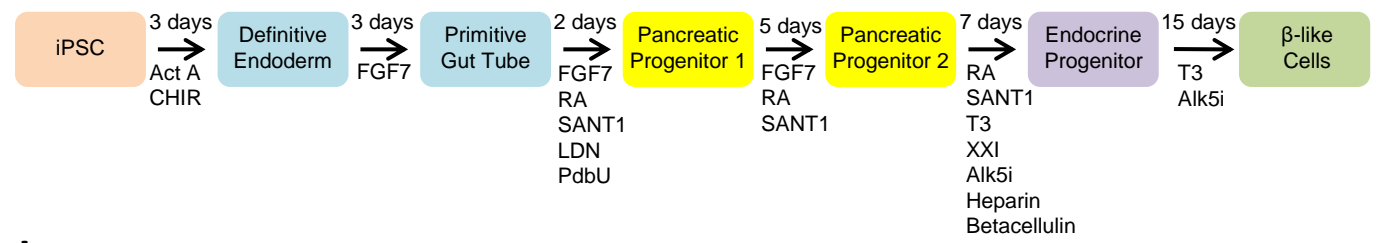

**b**

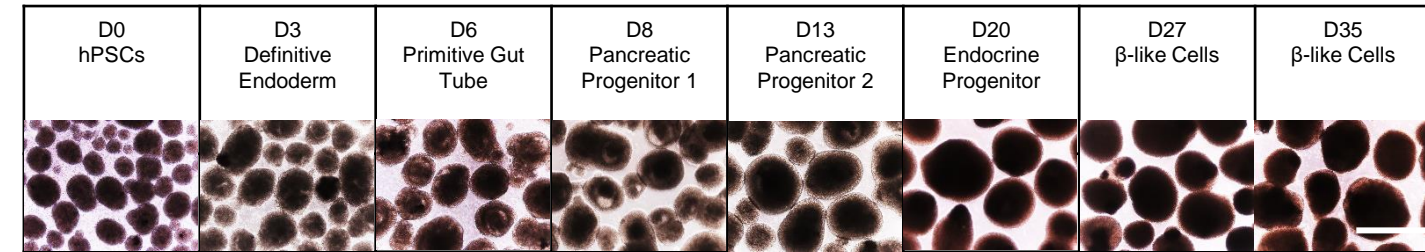

**c**

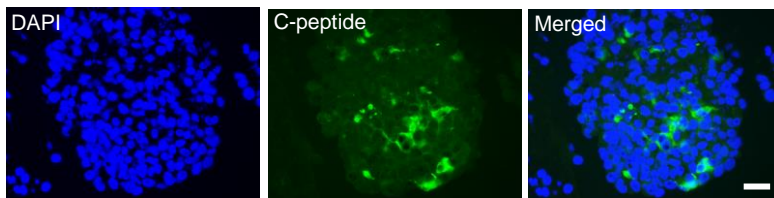

**d**

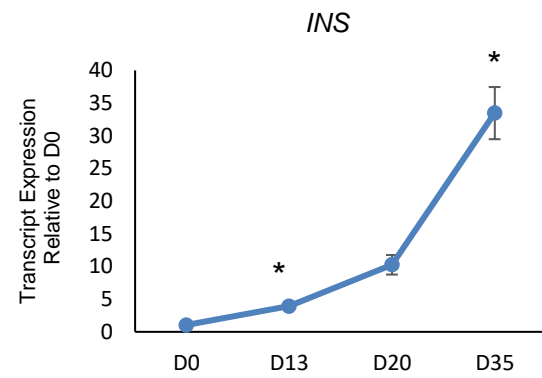

**e**

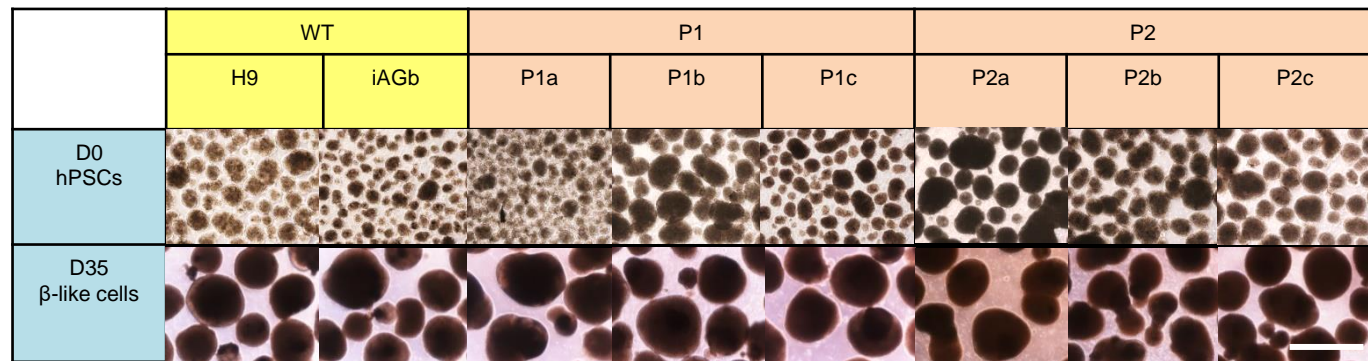

**f**

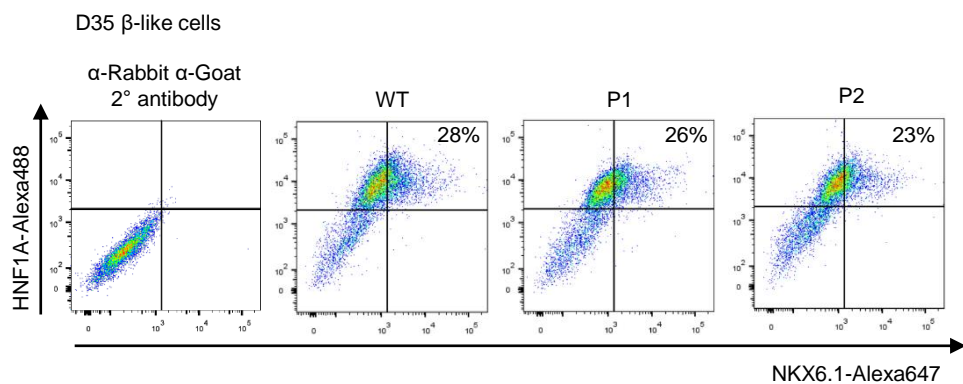

**Supplementary Figure 3. Differentiation of MODY3 patient-specific hiPSCs along the pancreatic lineage.** (a) Schematic of differentiation protocol and growth factors added at each stage of pancreatic differentiation. (b) Cell clusters at various stages during the 35-day pancreatic differentiation. n = 3 independent experiments. (scale bar: 100  $\mu$ m). (c) Immunohistochemistry stain for C-peptide protein (green) and nuclear stain using DAPI (blue) in H9 cell clusters at day 35 of pancreatic differentiation. n = 3 independent experiments. (scale bar: 50  $\mu$ m). (d) RT-qPCR analysis of *INS* transcripts in H9 during various stages of pancreatic differentiation. n = 3 independent experiment. Error bars represent standard error of mean (SEM). (e) WT and mutant cell clusters at the start and end of the 35-day pancreatic differentiation. n = 3 independent experiments. (scale bar: 100  $\mu$ m). (f) Flow cytometry analysis of HNF1A and NKX6.1 proteins in D35  $\beta$ -like cells. D: day of differentiation. hPSCs: human pluripotent stem cells. P1a-c: cell lines generated from P1, P2a-c: cell lines generated from P2. WT: wild type, P1: patient 1, P2: patient 2. For all statistical analysis: Error bars represent standard error of mean (SEM). Unpaired one-tailed Student's t-test was performed. \* indicates P-value < 0.05 compared to D0. Source data are provided as a Source data file.

Figure S4: Low et al.,

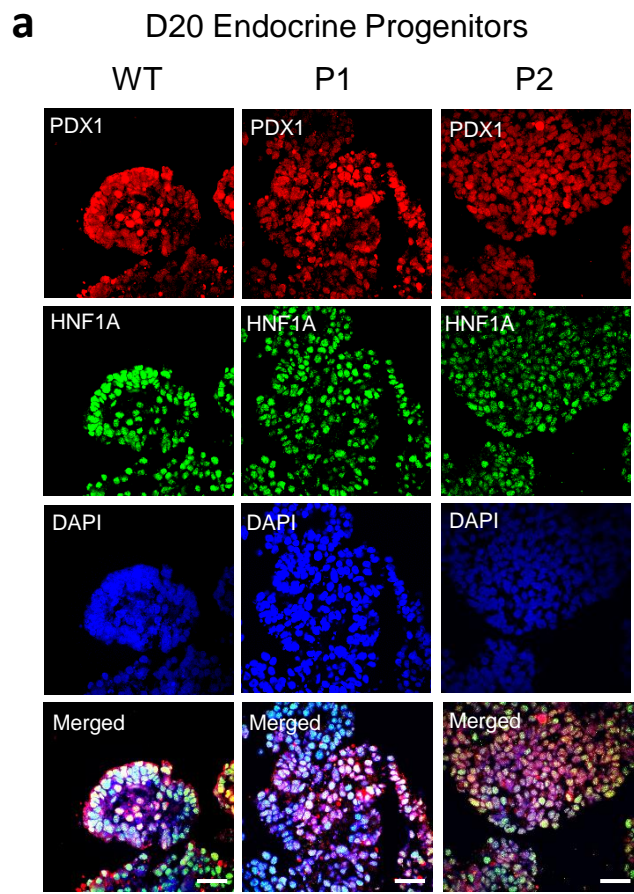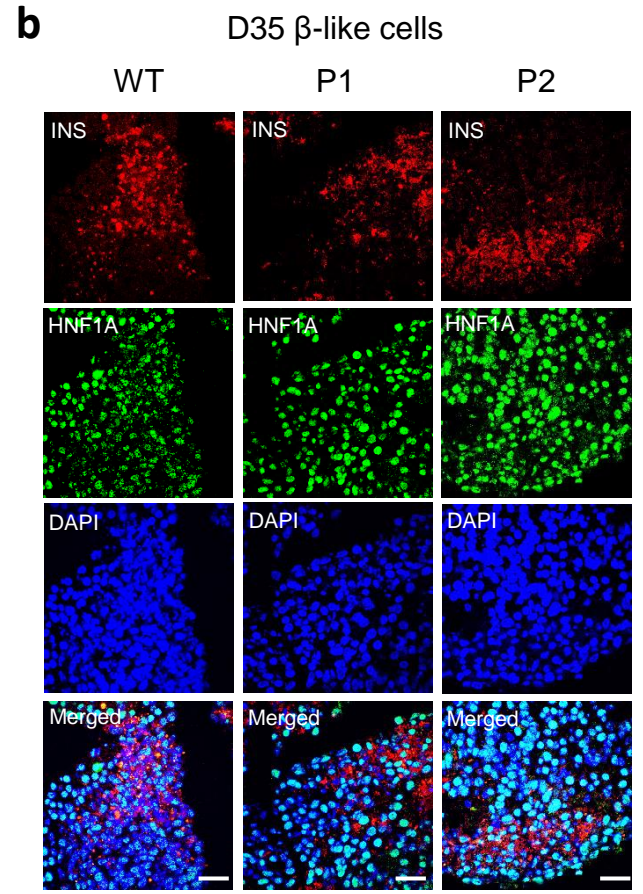

**Supplementary Figure 4. Comparison of pancreatic differentiation between WT and MODY3-hiPSCs.** (a) Immunohistochemistry stain for HNF1A protein (green), PDX1 protein (red) and nuclear stain using DAPI (blue) in WT, P1 and P2 endocrine progenitor cell clusters at day 20 of pancreatic differentiation. n = 3 independent experiments. (scale bar: 100  $\mu$ m). (b) Immunohistochemistry stain for HNF1A protein (green), INS protein (red) and nuclear stain using DAPI (blue) in WT, P1 and P2 D35  $\beta$ -like cell clusters at day 35 of pancreatic differentiation. n = 3 independent experiments. (scale bar: 100  $\mu$ m). D: day of differentiation. WT: wild type, P1: patient 1, P2: patient 2. hiPSCs: human induced pluripotent stem cells. Source data are provided as a Source data file.

Figure S5: Low et al.,

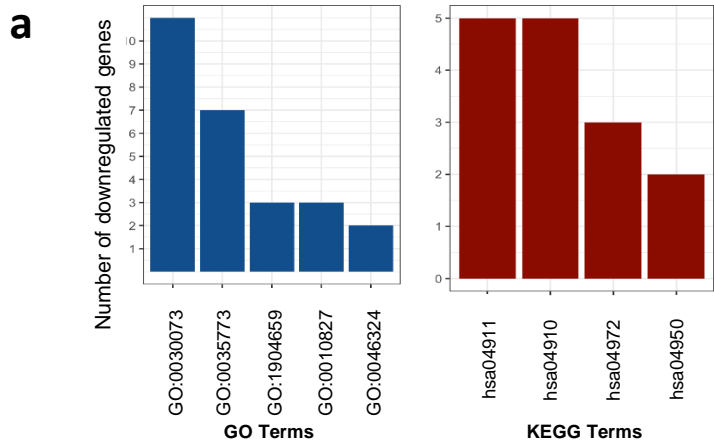

**b**

| GO/KEGG ID | Description                                                         | Downregulated Genes                                                              | P-value |
|------------|---------------------------------------------------------------------|----------------------------------------------------------------------------------|---------|
| GO:0030073 | insulin secretion                                                   | <i>PTPRN2, BAIAP3, LRP5, MAFA, PHPT1, LRP1, TRPM4, PFKL, RAB11B, ARL2, ITPR3</i> | 0.002   |
| GO:0035773 | insulin secretion involved in cellular response to glucose stimulus | <i>PTPRN2, BAIAP3, LRP5, PHPT1, LRP1, TRPM4, RAB11B</i>                          | 0.012   |
| GO:1904659 | glucose transmembrane transport                                     | <i>RNASEL, TRIB3, ASPSCR1</i>                                                    | 0.214   |
| GO:0010827 | regulation of glucose transmembrane transport                       | <i>RNASEL, TRIB3, ASPSCR1</i>                                                    | 0.295   |
| GO:0046324 | regulation of glucose import                                        | <i>RNASEL, ASPSCR1</i>                                                           | 0.512   |
| hsa04911   | Insulin secretion Pathway                                           | <i>RAB3A, ATP1A3, TRPM4, CREB3L1, ITPR3</i>                                      | 0.177   |
| hsa04910   | Insulin signalling pathway                                          | <i>RPTOR, MAP2K2, PCK1, PCK2, FASN</i>                                           | 0.353   |
| hsa04972   | Pancreatic secretion                                                | <i>SLC4A4, ATP1A3, ITPR3</i>                                                     | 0.042   |
| hsa04950   | Maturity onset diabetes of the young                                | <i>MAFA, IAPP</i>                                                                | 0.060   |

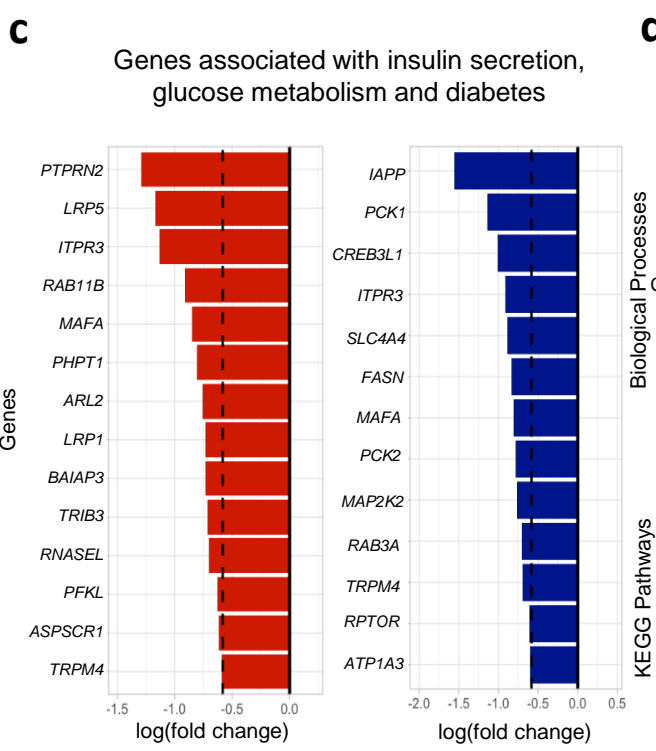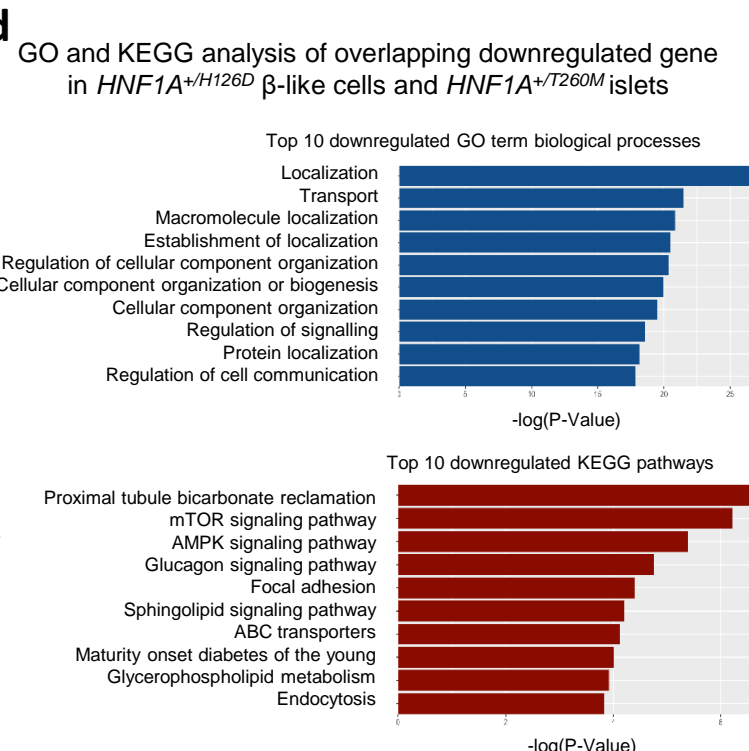

**Supplementary Figure 5. Bioinformatics analyses of *HNF1A* transcriptomics datasets.** (a) Number of gene candidates that are downregulated in *HNF1A*<sup>+/*H126D*</sup> endocrine progenitors that are associated with insulin secretion, glucose metabolism and diabetes according to Gene Ontology (GO) and Kyoto Encyclopedia of Genes and Genomes (KEGG) annotation. Unadjusted P-value were calculated using two-sided Mann-Whitney U test according to the GOSeq protocol (Young et al., 2010). (b) Table showing the details of each GO and KEGG annotation along with the list of gene candidates and P value. Unadjusted P-value were calculated using two-sided Mann-Whitney U test according to the GOSeq protocol (Young et al., 2010). (c) Transcript fold change of gene candidates that are downregulated in *HNF1A*<sup>+/*H126D*</sup> endocrine progenitors that are associated with insulin secretion, glucose metabolism and diabetes based on RNA-Seq analysis. Black dotted line indicates cut-off of 1.5-fold. (d) GO and KEGG analysis of the 347 genes commonly downregulated in both *HNF1A*<sup>+/*H126D*</sup> endocrine progenitors and *HNF1A*<sup>+/*T260M*</sup> islets. Bar chart showing the top 10 GO biological processes and KEGG pathway affected, ranked by ascending order of p value. Unadjusted P-value were calculated using two-sided Mann-Whitney U test according to the GOSeq protocol (Young et al., 2010). ChIP-Seq: Chromatin immunoprecipitation sequencing. WT: wild type.

Figure S6: Low et al.,

**a** CHIP-Seq motif ranking for WT endocrine progenitors

\* - possible false positive

| Rank | Motif | P-value | log P-pvalue | % of Targets | % of Background |
|------|-------|---------|--------------|--------------|-----------------|
| 1    |       | 1e-229  | -5.281e+02   | 57.38%       | 1.53%           |
| 2    |       | 1e-16   | -3.773e+01   | 22.62%       | 7.34%           |
| 3    |       | 1e-13   | -3.155e+01   | 2.30%        | 0.01%           |
| 4    |       | 1e-12   | -2.884e+01   | 7.87%        | 1.14%           |
| 5    |       | 1e-12   | -2.841e+01   | 5.57%        | 0.49%           |
| 6 *  |       | 1e-11   | -2.665e+01   | 10.82%       | 2.49%           |
| 7 *  |       | 1e-10   | -2.324e+01   | 1.64%        | 0.01%           |
| 8 *  |       | 1e-9    | -2.267e+01   | 3.28%        | 0.16%           |
| 9 *  |       | 1e-9    | -2.150e+01   | 24.59%       | 11.79%          |
| 10 * |       | 1e-8    | -2.015e+01   | 3.28%        | 0.21%           |
| 11 * |       | 1e-8    | -1.888e+01   | 5.90%        | 1.05%           |
| 12 * |       | 1e-7    | -1.701e+01   | 0.98%        | 0.00%           |
| 13 * |       | 1e-1    | -3.693e+00   | 0.33%        | 0.01%           |

**b** CHIP-Seq motif ranking for *HNF1A*<sup>+H126D</sup> endocrine progenitors

\* - possible false positive

| Rank | Motif | P-value | log P-pvalue | % of Targets | % of Background |
|------|-------|---------|--------------|--------------|-----------------|
| 1    |       | 1e-12   | -2.782e+01   | 11.54%       | 0.06%           |
| 2 *  |       | 1e-10   | -2.366e+01   | 23.08%       | 1.67%           |
| 3 *  |       | 1e-8    | -2.033e+01   | 5.77%        | 0.00%           |
| 4 *  |       | 1e-8    | -1.989e+01   | 7.69%        | 0.03%           |
| 5 *  |       | 1e-7    | -1.736e+01   | 21.15%       | 2.34%           |
| 6 *  |       | 1e-7    | -1.691e+01   | 15.38%       | 0.99%           |
| 7 *  |       | 1e-7    | -1.652e+01   | 19.23%       | 1.98%           |
| 8 *  |       | 1e-6    | -1.598e+01   | 11.54%       | 0.43%           |
| 9 *  |       | 1e-6    | -1.444e+01   | 28.85%       | 6.37%           |
| 10 * |       | 1e-4    | -1.042e+01   | 19.23%       | 3.92%           |



**Supplementary Figure 6. ChIP-Seq analyses of motifs enriched in the HNF1A-bound regions in WT and MODY3 endocrine progenitors.** Motifs enriched in the HNF1A-bound regions of (a) WT endocrine progenitors and (b) *HNF1A*<sup>+/*H126D*</sup> endocrine progenitors. Cumulative Poisson p-value was determined according to protocol specified in the HOMER software suite (v4.11) using findMotifsGenome.pl. (Heinz et al., 2010).

Figure S7: Low et al.,

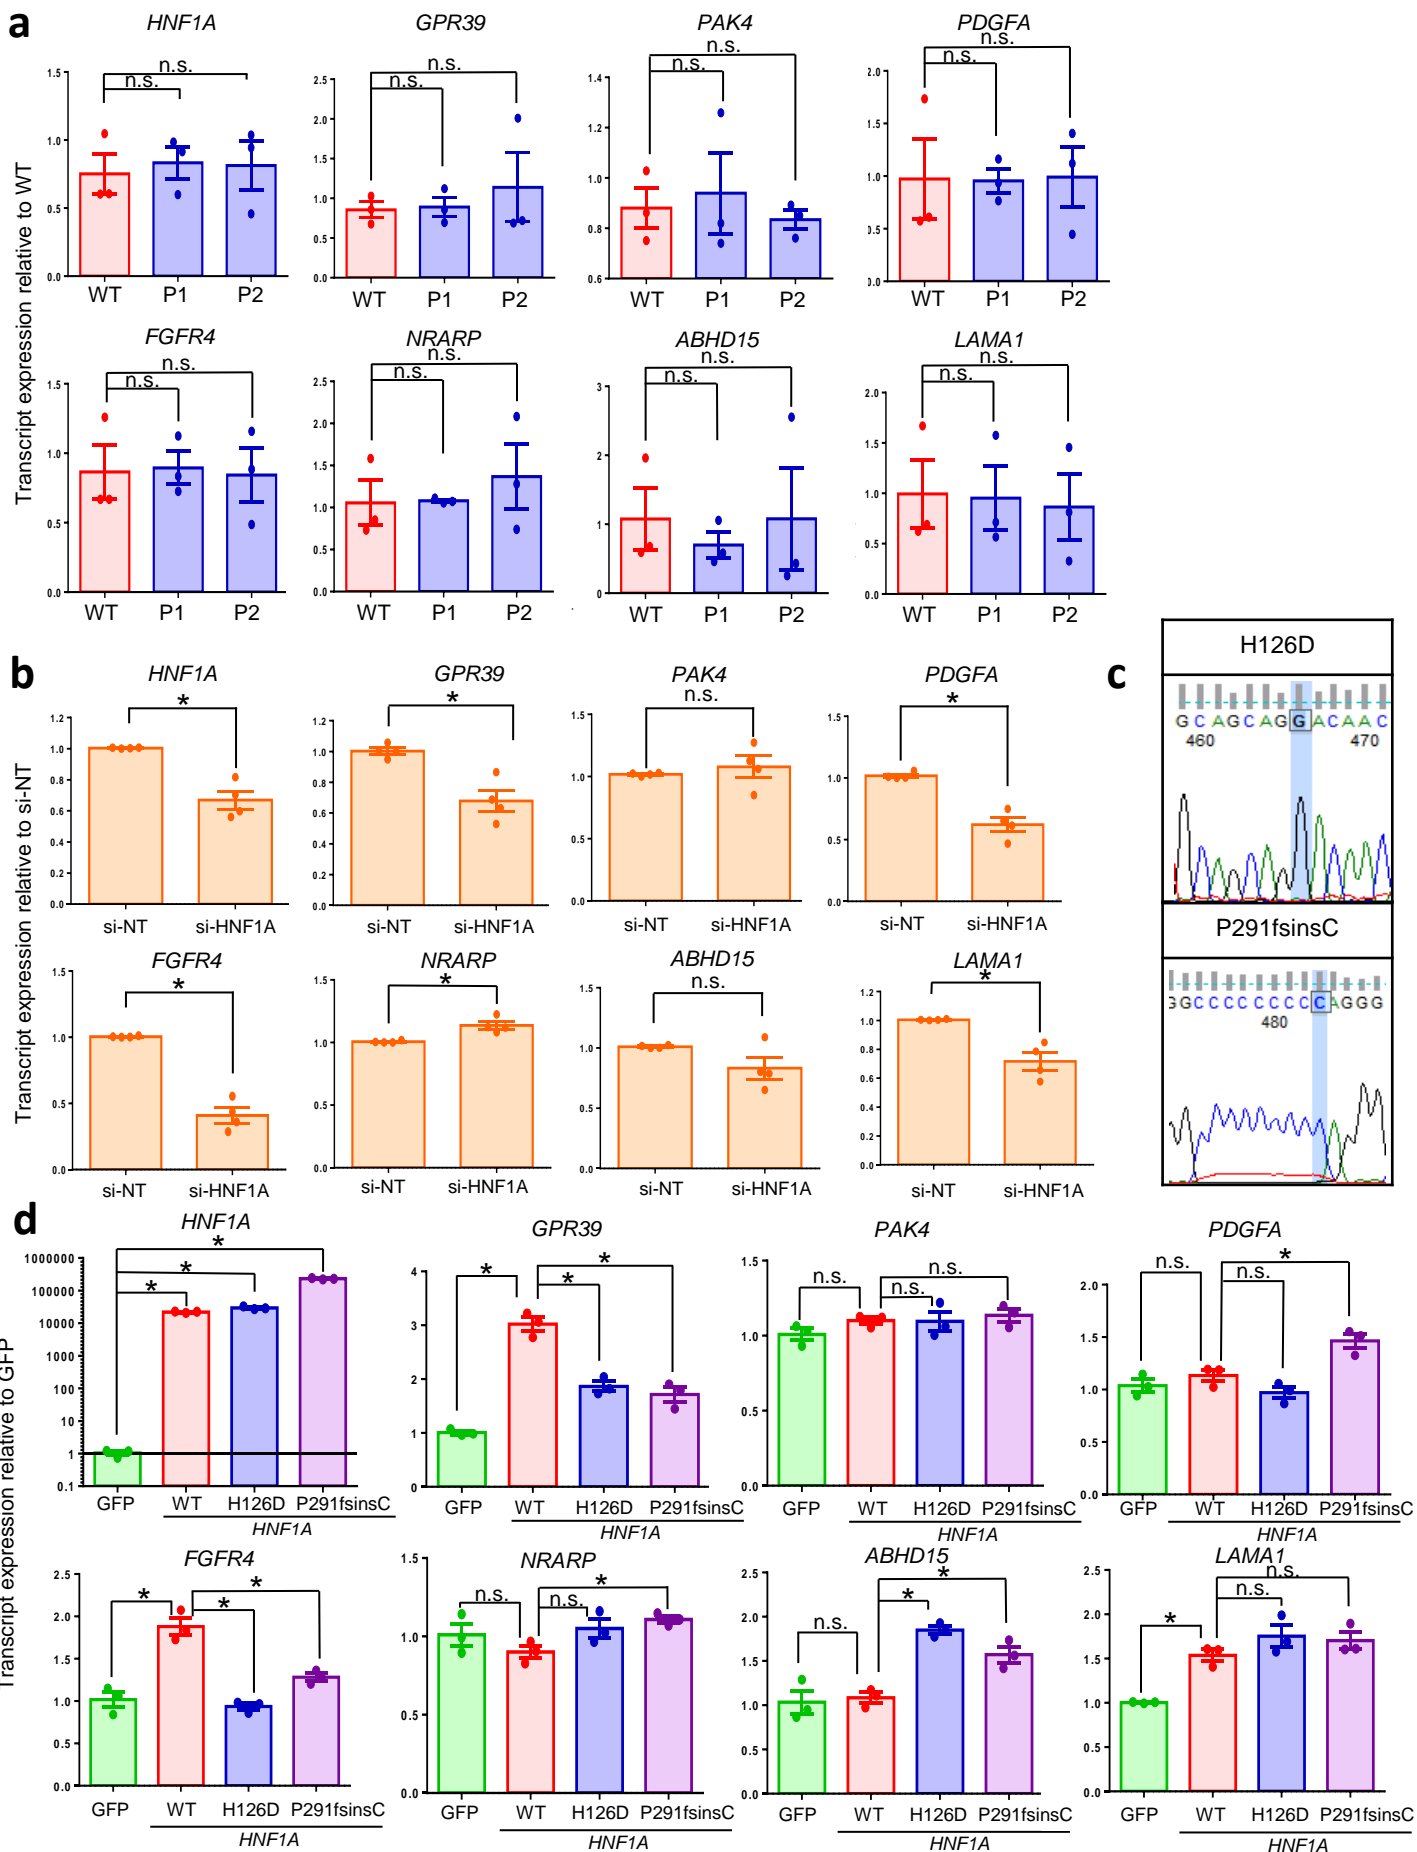

**Supplementary Figure 7. Evaluation of putative HNF1A targets affected by *HNF1A*<sup>+/H126D</sup> mutation based on RNA-Seq and CHIP-Seq analyses.** RT-qPCR analysis of candidate genes in (a) WT (red) and mutant (blue) hPSC-derived endocrine progenitors. n = 3 independent experiments. or (b) EndoC-βH1 cells transfected with *HNF1A* siRNA (si-HNF1A) and non-targeting siRNA as negative control (si-NT). n = 3 independent experiments. P-value for *HNF1A* = 0.0102, *GPR39* = 0.0151, *PDGFA* = 0.0051, *FGFR4* = 0.0018, *NRARP* = 0.0220, *LAMA1* = 0.0180. (c) Cycle sequencing confirmed successful site directed mutagenesis nucleotide change (highlighted) to generate *HNF1A* constructs containing p.H126D c.376C>G and P291fsinsC mutations. Cytosine in blue, thymine in red, guanine in black, adenine in green. (d) RT-qPCR analysis of candidate genes in AD-293 cells overexpressed with GFP (green) and various WT (red), H126D (blue) and P291fsinsC (purple) *HNF1A* constructs. n = 3 independent experiments. P-value for *HNF1A* = 0.0007 (WT), 0.0034 (H126D), 0.0006 (P291fsinsC); *GPR39* = 0.0025 (WT), 0.0028 (H126D), 0.0023 (P291fsinsC); *PDGFA* = 0.0229 (P291fsinsC); *FGFR4* = 0.0034 (WT), 0.0056 (H126D), 0.0155 (P291fsinsC); *NRARP* = 0.0178 (P291fsinsC); *ABHD15* = 0.0007 (H126D), 0.01580 (P291fsinsC); *LAMA1* = 0.0141 (WT). GFP: green fluorescent protein. WT: wild type, P1: patient 1, P2: patient 2. RT-qPCR: quantitative reverse transcription polymerase chain reaction. hPSCs: human pluripotent stem cells. WT: wild type, P1: patient 1, P2: patient 2. For all statistical analysis: Error bars represent standard error of mean (SEM). Unpaired one-tailed Student's t-test was performed. \* indicates P-value < 0.05. Source data are provided as a Source data file.

Figure S8: Low et al.,

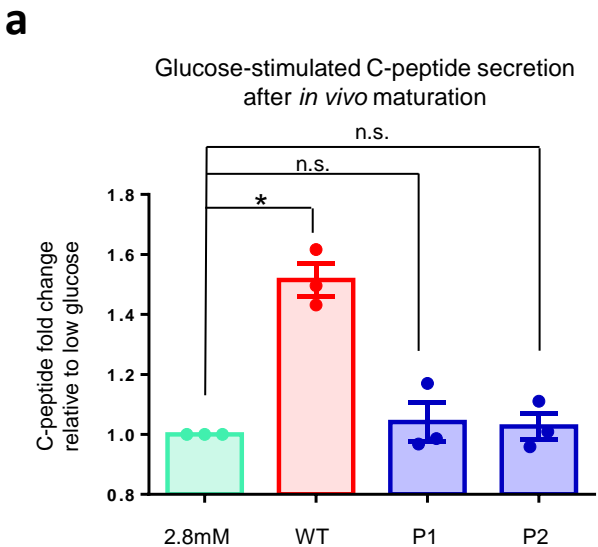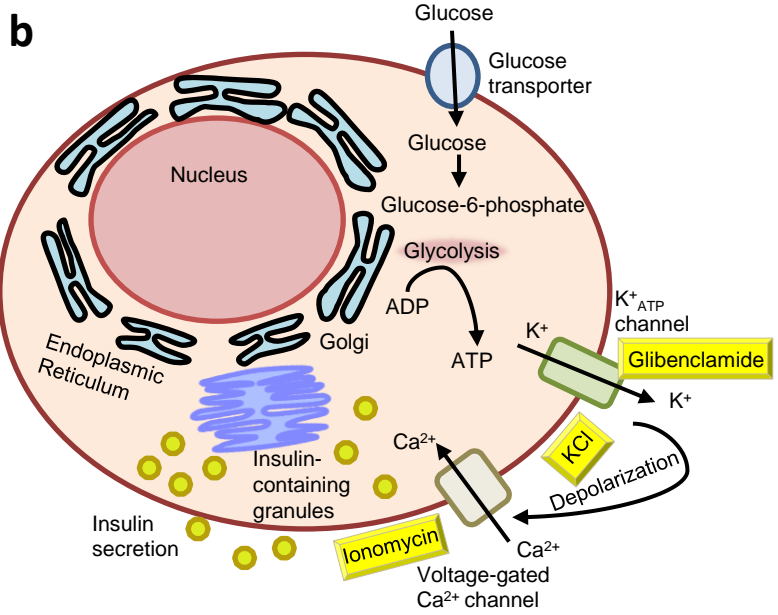

**Supplementary Figure 8. Stimulus-secretion coupling in  $\beta$  cell.** (a) Glucose-stimulated C-peptide secretion of WT (red) and patient-specific (blue) hPSC-derived  $\beta$ -like cells after *in vivo* maturation in mouse kidney capsule for 23 weeks. All C-peptide fold changes are normalized to C-peptide amounts secreted at 2.8 mM glucose (green) under each condition.  $n = 3$  independent experiments;  $p = 0.0006$  (WT). (b) Diagram of stimulus-secretion coupling in human  $\beta$  cell. WT: wild type, P1: patient 1, P2: patient 2. hPSCs: human pluripotent stem cells. For all statistical analysis: Error bars represent standard error of mean (SEM). Unpaired one-tailed Student's t-test was performed. \* indicates P-value  $< 0.05$ . Source data are provided as a Source data file.

Figure S9: Low et al.,

a

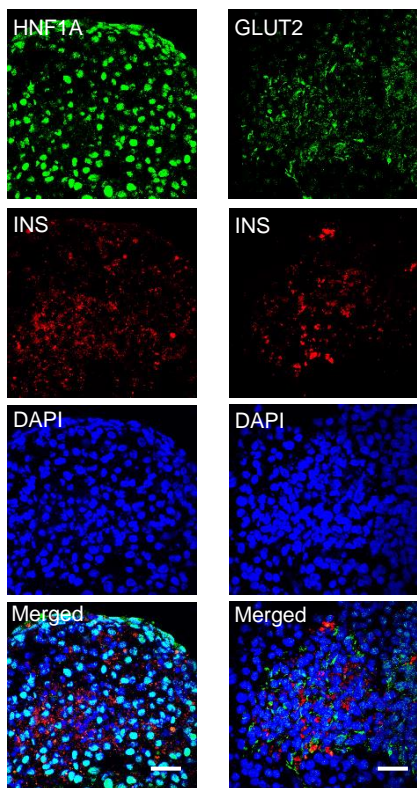

**Supplementary Figure 9. Evaluation of HNF1A and GLUT2 co-expression with INS in  $\beta$ -like cells.** Immunohistochemistry stain for HNF1A (green), GLUT2 (green), INS (red) proteins and nuclear stain using DAPI (blue) in cell clusters at day D35 of pancreatic differentiation. n = 3 independent experiments. (scale bar: 100  $\mu$ m). D: day of differentiation.

Figure S10: Low et al.,

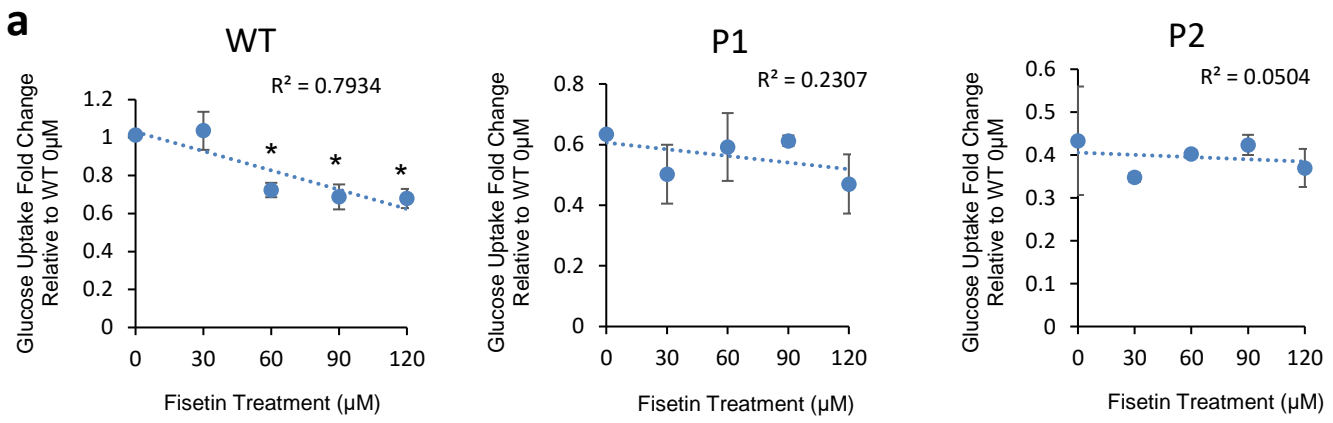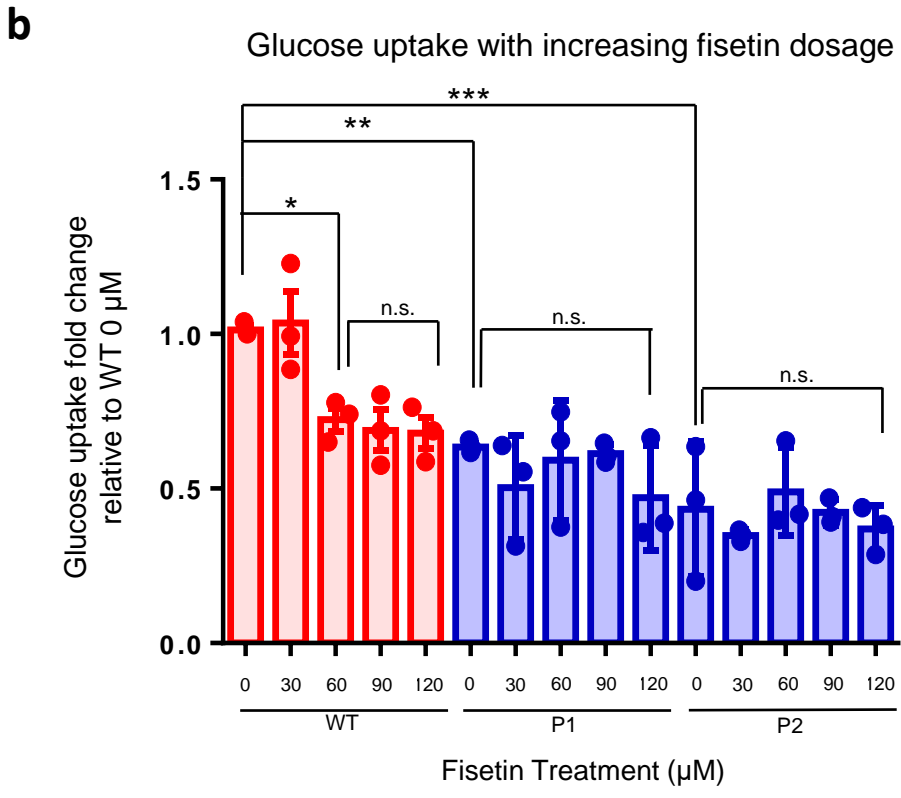



**Supplementary Figure 10. Evaluation of increasing fisetin dosage on glucose uptake inhibition.** (a) Glucose uptake fold changes with increasing concentrations (0  $\mu\text{m}$ , 30  $\mu\text{m}$ , 60  $\mu\text{m}$ , 90  $\mu\text{m}$  and 120  $\mu\text{m}$ ) of GLUT2 inhibitor, fisetin in WT (red), P1 and P2 (blue) hPSC-derived  $\beta$ -like cells. Effectiveness of fisetin in reducing glucose uptake measured by Pearson's  $R^2$ . Glucose uptake fold changes are normalized to glucose uptake amount in the presence of dimethyl sulfoxide (DMSO) (0  $\mu\text{m}$  fisetin) in WT  $\beta$ -like cells.  $n = 3$  independent experiments;  $p = 0.0098$  (60  $\mu\text{m}$ ); 0.0341 (90  $\mu\text{m}$ ), 0.0172 (120  $\mu\text{m}$ ). \* indicates P-value  $< 0.05$  using pairwise t-test compared to 0  $\mu\text{m}$  treatment. (b) Glucose uptake in WT, P1 and P2 hPSC-derived  $\beta$ -like cells in the presence of DMSO (0  $\mu\text{m}$  fisetin) or increasing concentrations (30  $\mu\text{m}$ , 60  $\mu\text{m}$ , 90  $\mu\text{m}$  and 120  $\mu\text{m}$ ) of GLUT2 inhibitor, fisetin. Glucose uptake fold changes are normalized to glucose uptake amount in the presence of DMSO (0  $\mu\text{m}$  fisetin) in WT  $\beta$ -like cells.  $n = 3$  independent experiments. One-way ANOVA was performed for group comparison ( $p = 5.14 \times 10^{-7}$ , F-critical = 8.52). Pairwise t-test was performed for pairwise comparison among independent groups; \*  $p = 0.0098$ , \*\*  $p = 0.00003$ , \*\*\*  $p = 0.0429$ , n.s.: non-significant. WT: wild type, P1: patient 1, P2: patient 2. hPSCs: human pluripotent stem cells. For all statistical analysis: Error bars represent standard error of mean (SEM). Source data are provided as a Source data file.

Figure S11: Low et al.,

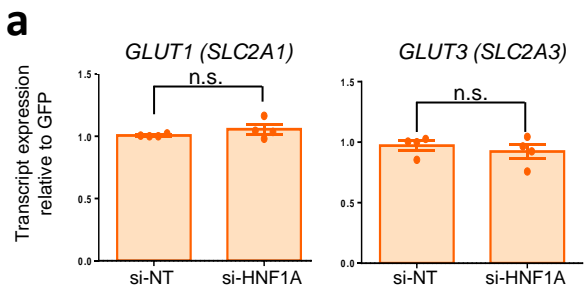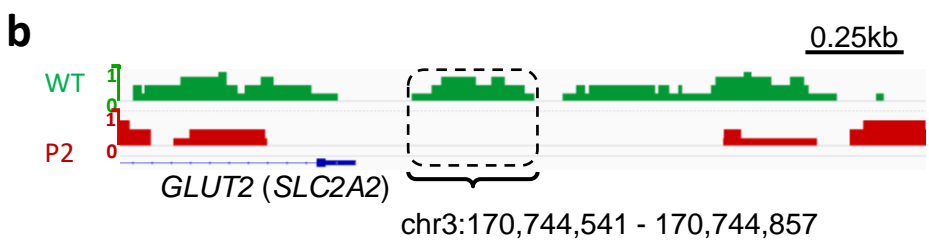

**Supplementary Figure 11. Evaluation of GLUTs.** (a) RT-qPCR analysis of *GLUT1* and *GLUT3* transcripts in EndoC- $\beta$ H1 cells transfected with *HNF1A* siRNA (si-HNF1A) and non-targeting siRNA as negative control (si-NT) (n=3). For all statistical analysis: Error bars represent standard error of mean (SEM). Unpaired one-tailed Student's t-test was performed. n = 3 independent experiments. \* indicates P-value < 0.05. (b) Histogram showing ChIP-Seq enrichment region in HNF1A-binding site on *GLUT2* (*SLC2A2*) promoter. Region where there is a difference in binding between WT (green) and P2 (*HNF1A*<sup>+H126D</sup>) (red) is highlighted in dotted-line box with the nearest coding gene shown. WT: wild type, P1: patient 1, P2: patient 2. RT-qPCR: quantitative reverse transcription polymerase chain reaction. ChIP-Seq: Chromatin immunoprecipitation sequencing. Source data are provided as a Source data file.
