# Supplementary material for: Decreased GLUT2 and glucose uptake contribute to insulin secretion defects in MODY3/HNF1A hiPSC-derived mutant β cells
Source: PubMed Central journal article supplement (PMC8149827; doi:10.1038/s41467-021-22843-4), 2021-05-25
Supplement: 41467_2021_22843_MOESM2_ESM.pdf [file 41467_2021_22843_MOESM2_ESM.pdf]

## Reporting Summary

Nature Research wishes to improve the reproducibility of the work that we publish. This form provides structure for consistency and transparency in reporting. For further information on Nature Research policies, see our [Editorial Policies](#) and the [Editorial Policy Checklist](#).

### Statistics

For all statistical analyses, confirm that the following items are present in the figure legend, table legend, main text, or Methods section.

- |                                     |                                                                                                                                                                                                                                                                                                |
|-------------------------------------|------------------------------------------------------------------------------------------------------------------------------------------------------------------------------------------------------------------------------------------------------------------------------------------------|
| n/a                                 | Confirmed                                                                                                                                                                                                                                                                                      |
| <input type="checkbox"/>            | <input checked="" type="checkbox"/> The exact sample size ( $n$ ) for each experimental group/condition, given as a discrete number and unit of measurement                                                                                                                                    |
| <input type="checkbox"/>            | <input checked="" type="checkbox"/> A statement on whether measurements were taken from distinct samples or whether the same sample was measured repeatedly                                                                                                                                    |
| <input type="checkbox"/>            | <input checked="" type="checkbox"/> The statistical test(s) used AND whether they are one- or two-sided<br><i>Only common tests should be described solely by name; describe more complex techniques in the Methods section.</i>                                                               |
| <input checked="" type="checkbox"/> | <input type="checkbox"/> A description of all covariates tested                                                                                                                                                                                                                                |
| <input checked="" type="checkbox"/> | <input type="checkbox"/> A description of any assumptions or corrections, such as tests of normality and adjustment for multiple comparisons                                                                                                                                                   |
| <input type="checkbox"/>            | <input checked="" type="checkbox"/> A full description of the statistical parameters including central tendency (e.g. means) or other basic estimates (e.g. regression coefficient) AND variation (e.g. standard deviation) or associated estimates of uncertainty (e.g. confidence intervals) |
| <input type="checkbox"/>            | <input checked="" type="checkbox"/> For null hypothesis testing, the test statistic (e.g. $F$ , $t$ , $r$ ) with confidence intervals, effect sizes, degrees of freedom and $P$ value noted<br><i>Give <math>P</math> values as exact values whenever suitable.</i>                            |
| <input checked="" type="checkbox"/> | <input type="checkbox"/> For Bayesian analysis, information on the choice of priors and Markov chain Monte Carlo settings                                                                                                                                                                      |
| <input checked="" type="checkbox"/> | <input type="checkbox"/> For hierarchical and complex designs, identification of the appropriate level for tests and full reporting of outcomes                                                                                                                                                |
| <input type="checkbox"/>            | <input checked="" type="checkbox"/> Estimates of effect sizes (e.g. Cohen's $d$ , Pearson's $r$ ), indicating how they were calculated                                                                                                                                                         |

*Our web collection on [statistics for biologists](#) contains articles on many of the points above.*

### Software and code

Policy information about [availability of computer code](#)

|                 |                                                                                                                                                                                                                                                                            |
|-----------------|----------------------------------------------------------------------------------------------------------------------------------------------------------------------------------------------------------------------------------------------------------------------------|
| Data collection | No software was used.                                                                                                                                                                                                                                                      |
| Data analysis   | PRISM v8<br>FlowJo 7.0<br>Tophat v2.0.14<br>HTSeq v0.6.1p1<br>edgeR v3.1.3<br>Trimmomatic v0.36<br>bowtie2 v2.3.4.3<br>AMBER v 14<br>VMD v 1.9.1<br>PyMOL v 1.3<br>HOMER v 4.11<br>MUSCLE v 3.6<br>Axiovision LE v 4.9.1<br>Olympus Fluoview v 3.1<br>Microsoft Excel 2016 |

For manuscripts utilizing custom algorithms or software that are central to the research but not yet described in published literature, software must be made available to editors and reviewers. We strongly encourage code deposition in a community repository (e.g. GitHub). See the Nature Research [guidelines for submitting code & software](#) for further information.

## Data

Policy information about [availability of data](#)

All manuscripts must include a [data availability statement](#). This statement should provide the following information, where applicable:

- Accession codes, unique identifiers, or web links for publicly available datasets
- A list of figures that have associated raw data
- A description of any restrictions on data availability

Data reported in this paper were deposited into Gene Expression Omnibus (GEO) accessible via accession numbers GSE140208 (RNA-Seq) (<https://www.ncbi.nlm.nih.gov/geo/query/acc.cgi?acc=GSE140208>) and GSE139832 (ChIP-Seq) (<https://www.ncbi.nlm.nih.gov/geo/query/acc.cgi?acc=GSE139832>). Crystal structure of WT HNF1A–DNA complex is available in Protein Data Bank (PDB 1IC8) (<https://www.rcsb.org/structure/1ic8>).

## Field-specific reporting

Please select the one below that is the best fit for your research. If you are not sure, read the appropriate sections before making your selection.

Life sciences  Behavioural & social sciences  Ecological, evolutionary & environmental sciences

For a reference copy of the document with all sections, see [nature.com/documents/nr-reporting-summary-flat.pdf](https://nature.com/documents/nr-reporting-summary-flat.pdf)

## Life sciences study design

All studies must disclose on these points even when the disclosure is negative.

|                 |                                                                                                                                                                                                                                                               |
|-----------------|---------------------------------------------------------------------------------------------------------------------------------------------------------------------------------------------------------------------------------------------------------------|
| Sample size     | WT = sample size of 2 (H9, iAGb)<br>P1 = sample size of 3 (1a, 1b, 1c)<br>P2 = sample size of 3 (2a, 2b, 2c)<br>This is a biological study. We apply the rule of thumb of minimum n=3. As this is not a population study, size calculation was not performed. |
| Data exclusions | No data excluded.                                                                                                                                                                                                                                             |
| Replication     | All experiments were done at least 3 times and are reproducible.                                                                                                                                                                                              |
| Randomization   | This is a prospective biological study. The study design does not require randomization.                                                                                                                                                                      |
| Blinding        | This is a prospective biological study. No blinding is applicable in this study.                                                                                                                                                                              |

## Reporting for specific materials, systems and methods

We require information from authors about some types of materials, experimental systems and methods used in many studies. Here, indicate whether each material, system or method listed is relevant to your study. If you are not sure if a list item applies to your research, read the appropriate section before selecting a response.

### Materials & experimental systems

|                                     |                                                                 |
|-------------------------------------|-----------------------------------------------------------------|
| n/a                                 | Involved in the study                                           |
| <input type="checkbox"/>            | <input checked="" type="checkbox"/> Antibodies                  |
| <input type="checkbox"/>            | <input checked="" type="checkbox"/> Eukaryotic cell lines       |
| <input checked="" type="checkbox"/> | <input type="checkbox"/> Palaeontology and archaeology          |
| <input type="checkbox"/>            | <input checked="" type="checkbox"/> Animals and other organisms |
| <input type="checkbox"/>            | <input checked="" type="checkbox"/> Human research participants |
| <input checked="" type="checkbox"/> | <input type="checkbox"/> Clinical data                          |
| <input checked="" type="checkbox"/> | <input type="checkbox"/> Dual use research of concern           |

### Methods

|                                     |                                                    |
|-------------------------------------|----------------------------------------------------|
| n/a                                 | Involved in the study                              |
| <input type="checkbox"/>            | <input checked="" type="checkbox"/> ChIP-seq       |
| <input type="checkbox"/>            | <input checked="" type="checkbox"/> Flow cytometry |
| <input checked="" type="checkbox"/> | <input type="checkbox"/> MRI-based neuroimaging    |

## Antibodies

Antibodies used

Goat anti-OCT4 Santa Cruz sc-8628 RRID:AB\_653551  
Rabbit anti-SOX2 Abcam ab97959 RRID:AB\_2341193  
Goat anti-NANOG R&D Systems AF1997 RRID:AB\_355097  
Mouse anti-SSEA4 STEMCELL Technologies 60062AD RRID:AB\_2721031  
Mouse anti-TRA-1-60 STEMCELL Technologies 60064AD RRID:AB\_2686905  
Mouse anti-ACTB ( $\beta$ -actin) Cell Signaling Technology 3700S RRID:AB\_2242334  
Rat anti-C-peptide Developmental Studies Hybridoma Bank GN-ID4 RRID:AB\_2255626  
Mouse anti-GATA4 Thermo Fisher Scientific MA5-15532 RRID:AB\_10989032

Rabbit anti-GLUT2 Abcam ab95256 RRID:AB\_10859605  
 Rabbit anti-GLUT2 Santa Cruz sc\_9117 RRID:AB\_641068  
 Rabbit anti-HNF1A Abcam ab96777 RRID:AB\_10679303  
 Rabbit anti-HNF1A Abcam ab204306  
 Goat anti-HNF1A Santa Cruz sc-6547 RRID:AB\_648295  
 Goat anti-HNF1A Santa Cruz sc-6548 RRID:AB\_648293  
 Guinea pig anti-INS Abcam ab7842 RRID:AB\_306130  
 Goat anti-NKX6.1 LifeSpan BioSciences LS-C124275 RRID:AB\_10805839  
 Guinea pig anti-PDX1 Abcam ab47308 RRID:AB\_777178  
 Goat anti-PDX1 R&D Systems AF2419 RRID:AB\_355257  
 Alexa Fluor® 488 Invitrogen, A11055  
 Alexa Fluor® 488 Invitrogen, 21202  
 Alexa Fluor® 488 Invitrogen, A21270  
 Alexa Fluor® 488 Invitrogen, A21206  
 Alexa Fluor® 594 Invitrogen, A11076  
 Alexa Fluor® 594 Invitrogen, A21203  
 Alexa Fluor® 594 Invitrogen, A11058  
 Alexa Fluor® 594 Invitrogen, A21207  
 Alexa Fluor® 488 Invitrogen, A21202  
 Alexa Fluor® 488 Invitrogen, A21206  
 Alexa Fluor® 647 Invitrogen, A21447  
 Alexa Fluor® 647 Jackson ImmunoResearch, 706-605-148  
 anti-goat IgG-HRP Santa Cruz sc-2354  
 anti-mouse IgG-HRP Bethyl labs A90-516P

## Validation

All antibodies are validated by the manufacturers.

Goat anti-OCT4 sc-8628): Epitope mapping near the N-terminus of Oct-3/4 of human origin.

Rabbit anti-SOX2 (ab97959)

Reacts with mouse, rat, human. Suitable for: Immunocytochemistry (ICC), Immunohistochemistry-paraffin (IHC-P), western blot (WB). ICC: NCCIT and NIH/3T3 cells. Dissociated induced pluripotent stem cells from mouse embryonic fibroblasts. Mouse embryonic stem cells. WB: NCCIT, IOUD2, HUES7, F9 and MCF7 whole cell lysate. IHC: Human brain glioma.

Goat anti-NANOG (AF1997)

Detects human Nanog in direct ELISAs and Western blots. In direct ELISAs, less than 1% cross-reactivity with recombinant mouse Nanog is observed. Application: western blot, chromatin immunoprecipitation, Immunocytochemistry.

Mouse anti-SSEA4 (60062AD)

Reactive Species: rhesus, cat, chicken, dog, human, mouse, rabbit, rat. Application: cell isolation, ELISA, flow cytometry, immunocytochemistry, immunofluorescence, immunohistochemistry.

Mouse anti-TRA-1-60 (60064AD)

Reactive Species: human, rhesus, rabbit. Application: cell isolation, flow cytometry, immunocytochemistry, immunofluorescence, immunoprecipitation, western blotting.

Mouse anti-ACTB ( $\beta$ -actin) (3700S)

Specificity / Sensitivity: detects endogenous levels of total  $\beta$ -actin protein. Due to the high sequence identity between the cytoplasmic actin isoforms,  $\beta$ -actin and cytoplasmic  $\gamma$ -actin, this antibody may cross-react with cytoplasmic  $\gamma$ -actin. It does not cross-react with  $\alpha$ -skeletal,  $\alpha$ -cardiac,  $\alpha$ -vascular smooth, or  $\gamma$ -enteric smooth muscle isoforms. Species Reactivity: human, mouse, rat, hamster, monkey, dog. Application: western blotting, immunohistochemistry (paraffin), immunofluorescence (immunocytochemistry), flow cytometry.

Rat anti-C-peptide (GN-ID4)

Recognizes the C-peptide (aa 33-63 of proinsulin) which separates insulin B chain (aa 1-30) from insulin A chain (aa 66-86) in the proinsulin protein (minus signal peptide sequence). Stains C-peptide in mature granules and proinsulin in immature granules of islet beta-cells. The antibody does not cross-react with rodent C-peptide/proinsulin. Species Reactivity: human, monkey. Applications: FACS, immunofluorescence, immunohistochemistry, immunoprecipitation.

Mouse anti-GATA4 (MA5-15532)

Species Reactivity: human, mouse, rat. Applications: western blot, immunocytochemistry, ChIP assay.

Rabbit anti-GLUT2 (ab95256)

Specificity: recognizes the ~53-61 kDa GLUT2 protein. It does not recognize other GLUT isoforms. Tested applications: Immunocytochemistry-immunofluorescence. Species reactivity: Human.

Rabbit anti-GLUT2 (sc\_9117)

Species reactivity: mouse, rat, human. Applications: western blotting, immunoprecipitation, immunofluorescence, immunohistochemistry, ELISA.

Rabbit anti-HNF1A (ab96777)

Reacts with: Human. Applications: western blotting, immunohistochemistry-paraffin, immunocytochemistry-immunofluorescence.

Rabbit anti-HNF1A (ab204306)

Species reactivity: Human. Tested applications: immunocytochemistry-immunofluorescence, immunohistochemistry-paraffin.

Goat anti-HNF1A (sc-6547)

Species reactivity: mouse, rat, human. Applications: western blotting, immunoprecipitation, immunofluorescence, ELISA.

Goat anti-HNF1A (sc-6548)

Raised against amino acids 80-284 of HNF-1 $\alpha$  of human origin. Species reactivity: mouse, rat, human. Applications: western blotting, immunoprecipitation, immunofluorescence, ELISA.

Guinea pig anti-INS (ab7842)

Species reactivity: mouse, rat, human, hamster. Applications: flow cytometry/cell sorting, immunocytochemistry-immunofluorescence, immunohistochemistry, immunohistochemistry-paraffin, immunoprecipitation.

Goat anti-NKX6.1 (LS-C124275)

Species reactivity: human, mouse. Applications: immunohistochemistry, western blotting, ELISA.

Guinea pig anti-PDX1 (ab47308)

Species reactivity: Mouse. Applications: immunocytochemistry-immunofluorescence.

Goat anti-PDX1 (AF2419)

Species Reactivity: human. Applications: western blot, immunocytochemistry, immunohistochemistry

## Eukaryotic cell lines

Policy information about [cell lines](#)

Cell line source(s)

H9 hESC line WiCell Research Institute NIHhESC-10-0062 RRID:CVCL\_9773  
AD-293 line Agilent 240085 RRID:CVCL\_KA63  
EndoC- $\beta$ H1 line Univercell Biosolutions EndoC- $\beta$ H1 RRID:CVCL\_L909  
Fibroblast (to generate iAGb) Coriell Institute AG16102 RRID:CVCL\_2G48  
CF-1 MEF Gibco A34181 RRID:CVCL\_5251

Authentication

Authentication of hiPSCs were performed using karyotyping.

Mycoplasma contamination

All cell lines were tested negative for mycoplasma contamination.

Commonly misidentified lines  
(See [ICLAC](#) register)

No commonly misidentified cell lines were used in the study.

## Animals and other organisms

Policy information about [studies involving animals](#); [ARRIVE guidelines](#) recommended for reporting animal research

Laboratory animals

NOD-SCID mice Taconic Biosciences NOD/MrkBomTac-Prkdcscid RRID:IMSR\_TAC:nodsc  
Males, 4-8 weeks old

Wild animals

Study did not involve wild animals.

Field-collected samples

Study did not involve samples collected from the field.

Ethics oversight

A\*STAR 2020-096; NHG DSRB 2013/01068.

Note that full information on the approval of the study protocol must also be provided in the manuscript.

## Human research participants

Policy information about [studies involving human research participants](#)

Population characteristics

Human research participants are female, siblings, harbor the same heterozygous H126D HNF1A mutation, and diagnosed with diabetes at 12 years old. At the point of P1 and P2 patient recruitment, they were above 21 years old (adults) but the specific age at recruitment is not available.

Recruitment

Participants were recruited by A/P Lim Su Chi. A/P Lim is their attending physician for their monogenic diabetes condition. Their gDNA has been screened for monogenic diabetes and HNF1A mutation was identified.

Ethics oversight

NHG DSRB; A\*STAR.

## ChIP-seq

### Data deposition

- Confirm that both raw and final processed data have been deposited in a public database such as [GEO](#).
- Confirm that you have deposited or provided access to graph files (e.g. BED files) for the called peaks.

#### Data access links

*May remain private before publication.*

We have deposited the BED files for the called peaks.  
Data reported in this paper were deposited into Gene Expression Omnibus (GEO) accessible via accession numbers GSE140208 (RNA-Seq) (<https://www.ncbi.nlm.nih.gov/geo/query/acc.cgi?acc=GSE140208>) and GSE139832 (ChIP-Seq) (<https://www.ncbi.nlm.nih.gov/geo/query/acc.cgi?acc=GSE139832>). Crystal structure of WT HNF1A–DNA complex is available in Protein Data Bank (PDB 1IC8) (<https://www.rcsb.org/structure/1ic8>).

#### Files in database submission

All files available are listed: <https://www.ncbi.nlm.nih.gov/geo/query/acc.cgi?acc=GSE140208>; <https://www.ncbi.nlm.nih.gov/geo/query/acc.cgi?acc=GSE139832>.

#### Genome browser session (e.g. [UCSC](#))

Not applicable.

### Methodology

#### Replicates

Datasets in ChIP-Seq analysis use DNA samples from three replicates of HNF1A H126D iPSC-derived endocrine progenitors and two replicates of WT hPSC-derived endocrine progenitors.

#### Sequencing depth

The NEXTSEQ High Output was performed using the Illumina NEXTSEQ 500 Sequencers with the Illumina® Reagent v2 (75 cycle kit) Kit. The DNA was attached to the flowcell surfaces and amplified to clusters, followed by attachment with the Sequencing primers and run at 1x76cycles, generating Single-Read 75 base-pair reads.

#### Antibodies

Rabbit anti-HNF1A Abcam ab96777 RRID:AB\_10679303

#### Peak calling parameters

Peaks were identified using the findPeaks program with default settings (-style factor).

#### Data quality

The quality of the reads is determined by Q-score calculation of the bcl2fastq software and attached PDF have the details. The data is only passed if the Q30 is above 75%, in this case all 3 libraries have passed.

#### Software

Trimmomatic v0.36  
bowtie2 v2.3.4.3  
Homer suite (UCSD)

## Flow Cytometry

### Plots

Confirm that:

- The axis labels state the marker and fluorochrome used (e.g. CD4-FITC).
- The axis scales are clearly visible. Include numbers along axes only for bottom left plot of group (a 'group' is an analysis of identical markers).
- All plots are contour plots with outliers or pseudocolor plots.
- A numerical value for number of cells or percentage (with statistics) is provided.

### Methodology

#### Sample preparation

D20 endocrine progenitors and D34 beta-like cells were differentiated from hPSCs using pancreatic differentiation protocol

#### Instrument

BD FACSymphony™ Flow Cytometer A5

#### Software

FlowJo 7.0 software

#### Cell population abundance

No cell sorting was performed in this manuscript

#### Gating strategy

First differentiated pancreatic lineage cells were gated on FSC /SSC, followed by gating for single cells on FSH/FSC. Cells were stained for markers of interest using antibodies. Percentage of positive cells were gated against blank and negative (secondary only) control staining.

- Tick this box to confirm that a figure exemplifying the gating strategy is provided in the Supplementary Information.
